# Supplementary material
Source: Springer Nature journal article supplement (https://www.springermedizin.de/resource/supplementary/12913_2012_2539_MOESM3_ESM.pdf/9531064)
Supplement: MOESM3 [file 9531064]

| Sub-dimension                                  | Item ID                                                      | Item                                                                                                          |                                                        | M     | SD          | 95% CI      |             |
|------------------------------------------------|--------------------------------------------------------------|---------------------------------------------------------------------------------------------------------------|--------------------------------------------------------|-------|-------------|-------------|-------------|
| Frequency of Events Reported                   | D1                                                           | When a mistake is made, but is caught and corrected before affecting the patient, how often is this reported? | Japan                                                  | 3.71  | 1.11        | (3.68–3.73) | }*          |
|                                                |                                                              |                                                                                                               | Taiwan                                                 | 3.18  | 0.93        | (3.16–3.19) |             |
|                                                |                                                              |                                                                                                               | U.S.                                                   | 3.54  | 1.11        | (3.54–3.55) |             |
|                                                | D2                                                           | When a mistake is made, but has no potential to harm the patient, how often is this reported?                 | Japan                                                  | 4.05  | 1.08        | (4.02–4.07) | }*          |
|                                                |                                                              |                                                                                                               | Taiwan                                                 | 2.99  | 0.94        | (2.97–3.01) |             |
|                                                |                                                              |                                                                                                               | U.S.                                                   | 3.60  | 1.09        | (3.60–3.61) |             |
|                                                | D3                                                           | When a mistake is made that could harm the patient, but does not, how often is this reported?                 | Japan                                                  | 4.13  | 1.12        | (4.11–4.16) | }*          |
|                                                |                                                              |                                                                                                               | Taiwan                                                 | 3.16  | 1.01        | (3.14–3.18) |             |
|                                                | Organizational Learning-Continuous Improvement               | A6                                                                                                            | We are actively doing things to improve patient safety | Japan | 3.99        | 0.78        | (3.72–3.76) |
| Taiwan                                         |                                                              |                                                                                                               |                                                        | 3.99  | 0.66        | (3.98–4.01) |             |
| U.S.                                           |                                                              |                                                                                                               |                                                        | 4.02  | 0.81        | (4.02–4.03) |             |
| A9                                             |                                                              | Mistakes have led to positive changes here                                                                    | Japan                                                  | 3.52  | 0.78        | (3.51–3.54) | }*          |
|                                                |                                                              |                                                                                                               | Taiwan                                                 | 3.90  | 0.61        | (3.88–3.91) |             |
|                                                |                                                              |                                                                                                               | U.S.                                                   | 3.61  | 0.88        | (3.60–3.61) |             |
| A13                                            |                                                              | After we make changes to improve patient safety, we evaluate their effectiveness                              | Japan                                                  | 3.17  | 0.85        | (3.15–3.19) | }*          |
|                                                |                                                              |                                                                                                               | Taiwan                                                 | 3.79  | 0.63        | (3.78–3.80) |             |
|                                                |                                                              |                                                                                                               | U.S.                                                   | 3.69  | 0.85        | (3.68–3.69) |             |
| Communication Openness                         | C2                                                           | Staff will freely speak up if they see something that may negatively affect patient care                      | Japan                                                  | 3.43  | 0.95        | (3.41–3.45) | }*          |
|                                                |                                                              |                                                                                                               | Taiwan                                                 | 3.35  | 0.87        | (3.33–3.36) |             |
|                                                |                                                              |                                                                                                               | U.S.                                                   | 3.97  | 0.89        | (3.97–3.98) |             |
|                                                | C4                                                           | Staff feel free to question the decisions or actions of those with more authority                             | Japan                                                  | 3.37  | 1.02        | (3.35–3.40) | }*          |
|                                                |                                                              |                                                                                                               | Taiwan                                                 | 3.19  | 0.89        | (3.17–3.20) |             |
|                                                |                                                              |                                                                                                               | U.S.                                                   | 3.32  | 1.10        | (3.31–3.32) |             |
|                                                | C6R                                                          | Staff are afraid to ask questions when something does not seem right                                          | Japan                                                  | 3.58  | 0.98        | (3.55–3.60) | }*          |
|                                                |                                                              |                                                                                                               | Taiwan                                                 | 3.17  | 0.88        | (3.15–3.19) |             |
|                                                |                                                              |                                                                                                               | U.S.                                                   | 3.67  | 1.02        | (3.67–3.67) |             |
| Staffing                                       | A2                                                           | We have enough staff to handle the workload                                                                   | Japan                                                  | 2.59  | 1.09        | (2.56–2.61) | }*          |
|                                                |                                                              |                                                                                                               | Taiwan                                                 | 2.83  | 1.05        | (2.81–2.85) |             |
|                                                |                                                              |                                                                                                               | U.S.                                                   | 3.22  | 1.21        | (3.21–3.22) |             |
|                                                | A5R                                                          | Staff in this unit work longer hours than is best for patient care                                            | Japan                                                  | 2.72  | 1.08        | (2.69–2.74) | }*          |
|                                                |                                                              |                                                                                                               | Taiwan                                                 | 2.92  | 1.01        | (2.90–2.94) |             |
|                                                |                                                              |                                                                                                               | U.S.                                                   | 3.32  | 1.10        | (3.32–3.33) |             |
|                                                | A7R                                                          | We use more agency/temporary staff than is best for patient care                                              | Japan                                                  | 3.76  | 1.06        | (3.73–3.78) | }*          |
|                                                |                                                              |                                                                                                               | Taiwan                                                 | 3.46  | 0.94        | (3.44–3.48) |             |
|                                                |                                                              |                                                                                                               | U.S.                                                   | 3.85  | 1.05        | (3.85–3.86) |             |
| A14R                                           | We work in "crisis mode", trying to do too much, too quickly | Japan                                                                                                         | 3.08                                                   | 1.01  | (3.06–3.11) | }*          |             |
|                                                |                                                              | Taiwan                                                                                                        | 2.94                                                   | 0.84  | (2.92–2.95) |             |             |
|                                                |                                                              | U.S.                                                                                                          | 3.15                                                   | 1.12  | (3.15–3.16) |             |             |
| Hospital Management Support for Patient Safety | F1                                                           | Hospital management provides a work climate that promotes patient safety                                      | Japan                                                  | 3.63  | 0.78        | (3.61–3.65) | }*          |
|                                                |                                                              |                                                                                                               | Taiwan                                                 | 3.63  | 0.73        | (3.62–3.64) |             |
|                                                |                                                              |                                                                                                               | U.S.                                                   | 3.90  | 0.89        | (3.89–3.90) |             |
|                                                | F8                                                           | The actions of hospital management show that patient safety is a top priority                                 | Japan                                                  | 3.39  | 0.88        | (3.36–3.41) | }*          |
|                                                |                                                              |                                                                                                               | Taiwan                                                 | 3.77  | 0.75        | (3.75–3.78) |             |
|                                                |                                                              |                                                                                                               | U.S.                                                   | 3.84  | 0.97        | (3.84–3.85) |             |
|                                                | F9R                                                          | Hospital management seems interested in patient safety only after an adverse event happens                    | Japan                                                  | 3.23  | 0.96        | (3.21–3.26) | }*          |
|                                                |                                                              |                                                                                                               | Taiwan                                                 | 3.17  | 0.94        | (3.15–3.19) |             |
|                                                |                                                              |                                                                                                               | U.S.                                                   | 3.43  | 1.11        | (3.43–3.44) |             |

M, mean; SD, standard deviation; CI, confidence interval

\*P < 0.01 and Cohen's d > |0.5|
